# Supplementary material for: The pvc Operon Regulates the Expression of the Pseudomonas aeruginosa Fimbrial Chaperone/Usher Pathway (Cup) Genes
Source: PubMed Central journal article supplement (PMC3639982; doi:10.1371/journal.pone.0062735), 2013-04-30
Supplement: pone.0062735.s005.pdf [file pone.0062735.s005.pdf]

**Table S1.** Oligonucleotides used in this study.

| Gene / Locus ID                      | Name                                           | Primer Sequence                                               |
|--------------------------------------|------------------------------------------------|---------------------------------------------------------------|
| <b>Cloning</b>                       |                                                |                                                               |
| <i>pvcA</i> , intact                 | <i>pvcA_operon2R</i>                           | GCCGTTGATCTGCACCA (paired with <i>pvcAB_operon2F</i> )        |
| <i>pvcB</i> , intact                 | <i>pvcB_operon2F</i>                           | GACGAACAGGGCAACCAG (paired with <i>pvcAB_operon2R</i> )       |
| <i>pvcAB</i> , intact                | <i>pvcAB_operon2F</i><br><i>pvcAB_operon2R</i> | GACAGTCTGAAGTTCGGCATC<br>ACGGCCACAGCATGACTT                   |
| <i>rocS1</i> , intact                | <i>rocS1F</i><br><i>rocS1R</i>                 | AGGTACCAGAACCTTCGTCCAGAAGATGA<br>AGAGCTCAACCGGAGTGTAGTCTTTTCC |
| <b>Analysis of <i>pvc</i> operon</b> |                                                |                                                               |
| <i>pvcAB</i> , intergenic            | <i>pvcABF</i><br><i>pvcABR</i>                 | AAGTTCGGCATCCACATGA<br>AGTAGCGGGTCAGGCTCTC                    |
| <i>pvcBC</i> , intergenic            | <i>pvcBCF</i><br><i>pvcBCR</i>                 | CAACCTGACCCTGTTGCAC<br>CCGGTAGTCGCCGTAGAA                     |
| <i>pvcCD</i> , intergenic            | <i>pvcCDF</i><br><i>pvcCDR</i>                 | CTACTGCGAGGCGATGGT<br>GCTGGGTCTTGAGGTCGTAG                    |
| <b>RT-qPCR</b>                       |                                                |                                                               |
| <i>cgrA</i> / PA2127                 | <i>cgrAF</i><br><i>cgrAR</i>                   | AAGAGCCTACCGCGTTCC<br>GTCCAGGGCGCATTGTTTC                     |
| <i>cupA1</i> / PA2128                | <i>cupA1F</i><br><i>cupA1R</i>                 | GCGGCAAACACTATCACATTC<br>AACAGGGTGTTGAAATGCTC                 |
| <i>cupB1</i> / PA4086                | <i>cupB1F</i><br><i>cupB1R</i>                 | GTCAACTTCTCGGGCAACA<br>ATGGAAACCTTCTTGTCATTGG                 |
| <i>cupB2</i> / PA4085                | <i>cupB2F</i><br><i>cupB2R</i>                 | CGCATCGCCTACCTGAA<br>TTCTGCTCCCCCTGAC                         |
| <i>cupB3</i> / PA4084                | <i>cupB3F</i><br><i>cupB3R</i>                 | TCCTTGCCCGAAGGTTT<br>TCCTGCCGTGGTTTTCC                        |
| <i>cupB4</i> / PA4083                | <i>cupB4F</i><br><i>cupB4R</i>                 | ACCCCGTCATCCGTCTC<br>TTGTTCAAGTCTTCTTCCTTGTT                  |
| <i>cupB5</i> / PA4082                | <i>cupB5F</i><br><i>cupB5R</i>                 | CGACTATCCGCCAACC<br>CTTGAACAGGCAATCATCCA                      |
| <i>cupB6</i> / PA4081                | <i>cupB6F</i><br><i>cupB6R</i>                 | CCGATAATGGCGTGGATG<br>ACCGCCGTCACCAGTTC                       |
| <i>cupC1</i> / PA0992                | <i>cupC1F</i><br><i>cupC1R</i>                 | AACCTGAACCTGGACTGTGG<br>TTGCCTTCGCCATCTTTT                    |
| <i>cupC2</i> / PA0993                | <i>cupC2F</i><br><i>cupC2R</i>                 | AGGCTGATAATGGGGCAGA<br>CGACGCAGATTTTTGTGGA                    |
| <i>cupC3</i> / PA0994                | <i>cupC3F</i><br><i>cupC3R</i>                 | TCGGCTGTGTATGGCTTGT<br>TTTCGGTGGCGTTGATG                      |
| <i>cupE4</i> / PA4651                | <i>cupE4F</i><br><i>cupE4R</i>                 | CGTCTATCGCAACCAGCA<br>CGTCGGGCACTTCGTC                        |
| <i>fliC</i> / PA1092                 | <i>fliCF</i><br><i>flicR</i>                   | TCCAACGCCTACGAGACC<br>TCGCACCGTCCATCTTCT                      |
| <i>flgK</i> / PA1086                 | <i>flgKF</i><br><i>flgKR</i>                   | GCGGCAAACACTATCACATTC<br>AACAGGGTGTTGAAATGCTC                 |

| Gene / Locus ID       | Name          | Primer Sequence        |
|-----------------------|---------------|------------------------|
| <b>RT-qPCR</b>        |               |                        |
| <i>lasB</i> / PA3724  | <i>lasBF</i>  | GTTCTATCCGCTGGTGTCTG   |
|                       | <i>lasBR</i>  | GCCCTTCTTGATGTCGTAGC   |
| <i>mexA</i> / PA0425  | <i>mexAF</i>  | TCAACCTGCGCTACACCA     |
|                       | <i>mexAR</i>  | GCTACCGTCCTCCAGCTTC    |
| <i>oprM</i> / PA0427  | <i>oprMF</i>  | GTTTCGGGTTCTGGTTGTT    |
|                       | <i>oprMR</i>  | TCGAGCAGGGTCAGGTAGTT   |
| <i>pelA</i> / PA3064  | <i>pelAF</i>  | GTCGCAGAACTCAAGGTCAA   |
|                       | <i>pelAR</i>  | CCTCCTCCAGCACATAGGG    |
| <i>pilA</i> / PA4525  | <i>pilAF</i>  | AACCTGAACCTGGACTGTGG   |
|                       | <i>pilAR</i>  | TTGCCTTCGCCATCTTTT     |
| <i>pprB</i> / PA4296  | <i>pprBF</i>  | CCGCCGACTACTACCAGAAA   |
|                       | <i>pprBR</i>  | GGCTGTTGCCGTGTACCT     |
| <i>pslA</i> / PA2231  | <i>pslAF</i>  | GACGACGACCGCATCAC      |
|                       | <i>pslAR</i>  | CGCTGACCGCCTCCT        |
| <i>pslD</i> / PA2232  | <i>pslDF</i>  | GCGTGCCCTGGAAGAAC      |
|                       | <i>pslDR</i>  | CTGGATGCGACCGATGA      |
| <i>pvcA</i> / PA2254  | <i>pvcAF</i>  | CCTGTGCTGTGCTTCCT      |
|                       | <i>pvcAR</i>  | CCTGGTAGGCGCTGATGT     |
| <i>pvcB</i> / PA2255  | <i>pvcBF</i>  | ATTCCCCATCCTGCGTTT     |
|                       | <i>pvcBR</i>  | CGTGCAACAGGGTCAGGT     |
| <i>pvcC</i> / PA2256  | <i>pvcCF</i>  | AAGGCGATCCACGAGATG     |
|                       | <i>pvcCR</i>  | CGAAGAACACAACAGCGAAG   |
| <i>pvcD</i> / PA2257  | <i>pvcDF</i>  | CCTCTCGGCCCTGCTT       |
|                       | <i>pvcDR</i>  | TCGGGTAGCTGCGGTTT      |
| <i>rocS1</i> / PA3946 | <i>rocS1F</i> | AGGCTGATAATGGGGCAGA    |
|                       | <i>rocS1R</i> | CGACGCAGATTTTTGTGGA    |
| <i>rocR1</i> / PA3947 | <i>rocR1F</i> | TCGGCTGTGTATGGCTTGT    |
|                       | <i>rocR1R</i> | TTTCGGTGGCGTTGATG      |
| <i>rocA1</i> / PA3948 | <i>rocA1F</i> | GTCAACTTCTCGGGCAACA    |
|                       | <i>rocA1R</i> | ATGGAAACCTTCTTGTCATTGG |
| <i>rocS2</i> / PA3044 | <i>rocS2F</i> | CGCATCGCCTACCTGAA      |
|                       | <i>rocS2R</i> | TTCTGCTCCCCCTGAC       |
| <i>rocA2</i> / PA3045 | <i>rocA2F</i> | TCCTCTGCCCGAAGGTTT     |
|                       | <i>rocA2R</i> | TCCTGCCGTGGTTTTCC      |
